# Supplementary material for: Phosphorylation modification of myofibrillar proteins by sodium pyrophosphate affects emulsion gel formation and oxidative stability under different pH conditions
Source: Royal Society of Chemistry journal article supplement (doi:10.1039/c9fo01397k), 2019-01-01

## Supporting Information

### Figure. S1

LC-MS/MS spectra of peptides digested from the SPP-modified MP at pH 6.0:

peptide <sup>9</sup>RAAEGSSNVFSMFDQTQIQEFK<sup>30</sup> at *m/z* 1301.08, with the covalent binding site at Ser14;

peptide <sup>75</sup>SSAESPLLTMESK<sup>87</sup> at *m/z* 730.32, with the covalent binding site at Ser79;

peptide <sup>85</sup>MVGGVTAGHHGSSK<sup>98</sup> at *m/z* 702.81 with the covalent binding site at Ser96;

peptide <sup>2422</sup>NLLIVSK<sup>2428</sup> at *m/z* 867.43 with the covalent binding site at Ser2427;

peptide <sup>5266</sup>PAVALKSPKPAAEPAPAITTAPVTTPVVVGK<sup>5295</sup> at *m/z* 987.55, with the covalent binding site at Ser5272;

peptide <sup>417</sup>KQGMKLELYPQK<sup>428</sup> at *m/z* 780.39, with the covalent binding site at Tyr425;

peptide <sup>918</sup>VADLLQHITQMKR<sup>930</sup> at *m/z* 824.91, with the covalent binding site at Thr926.

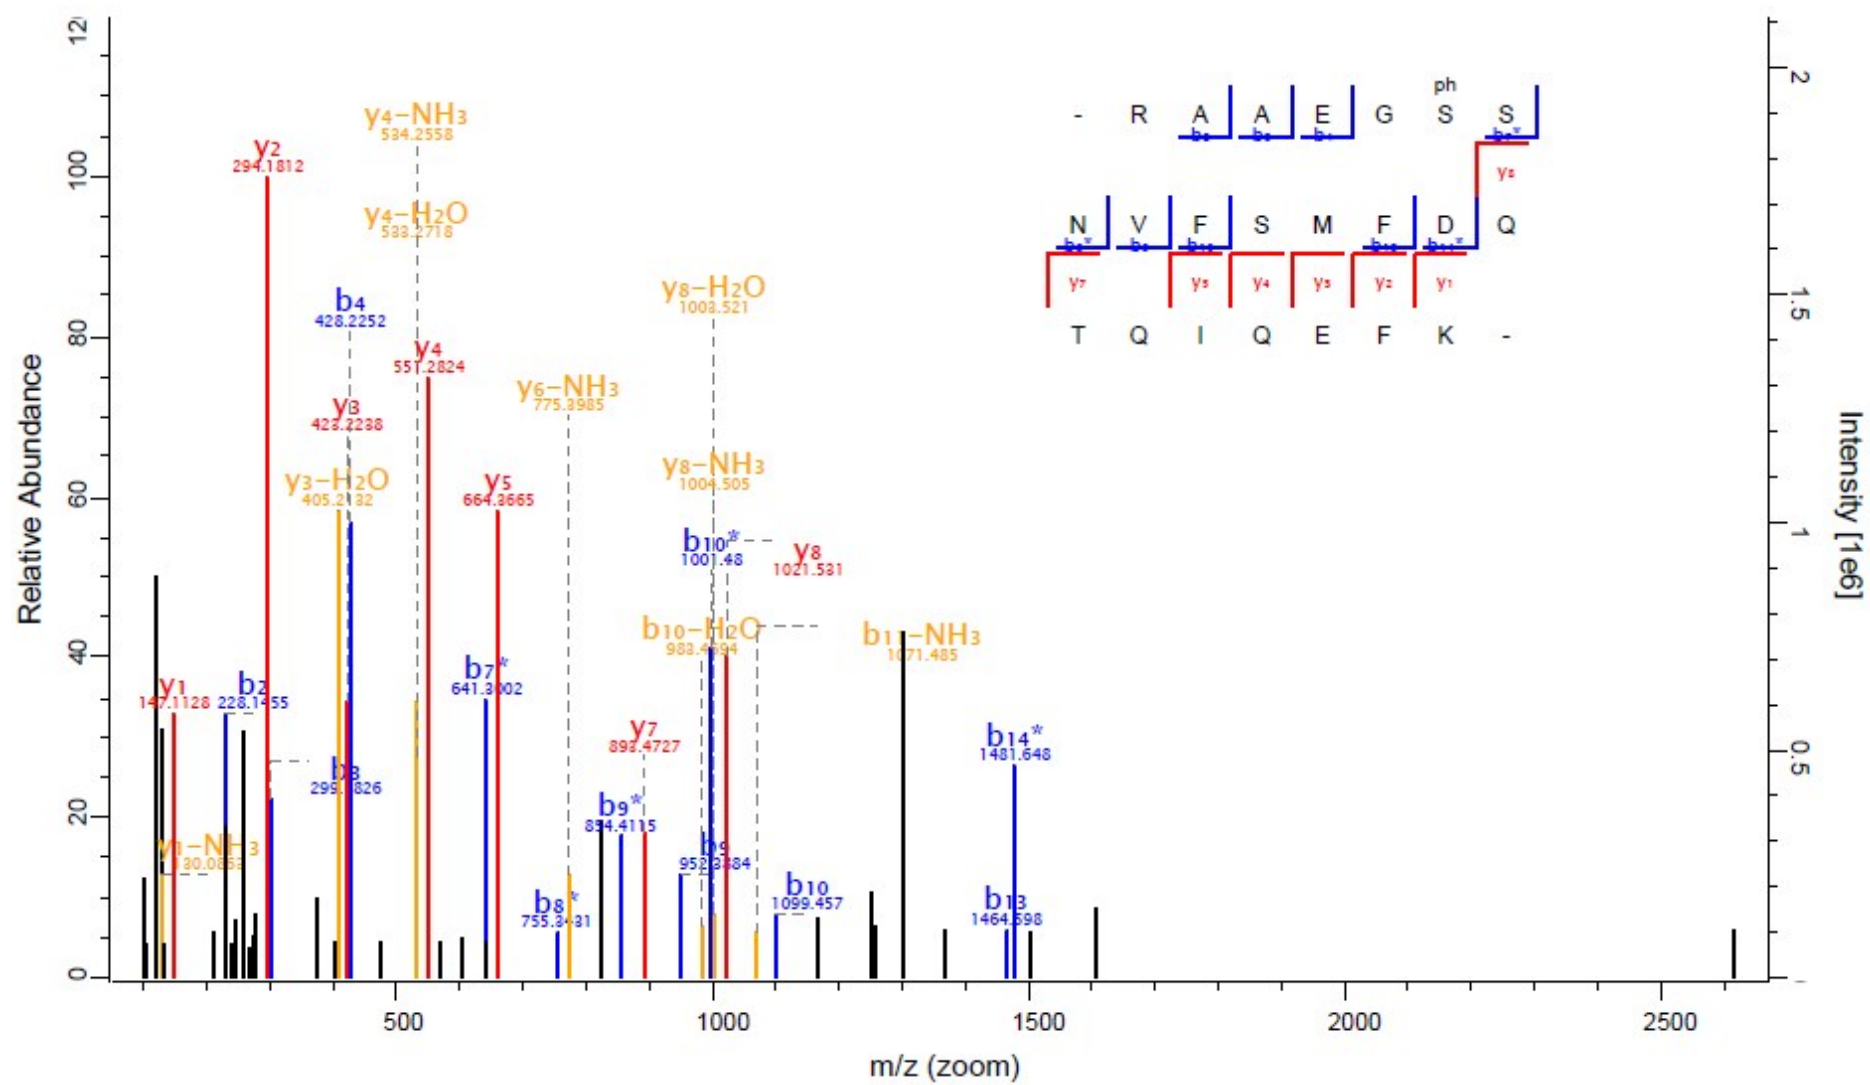

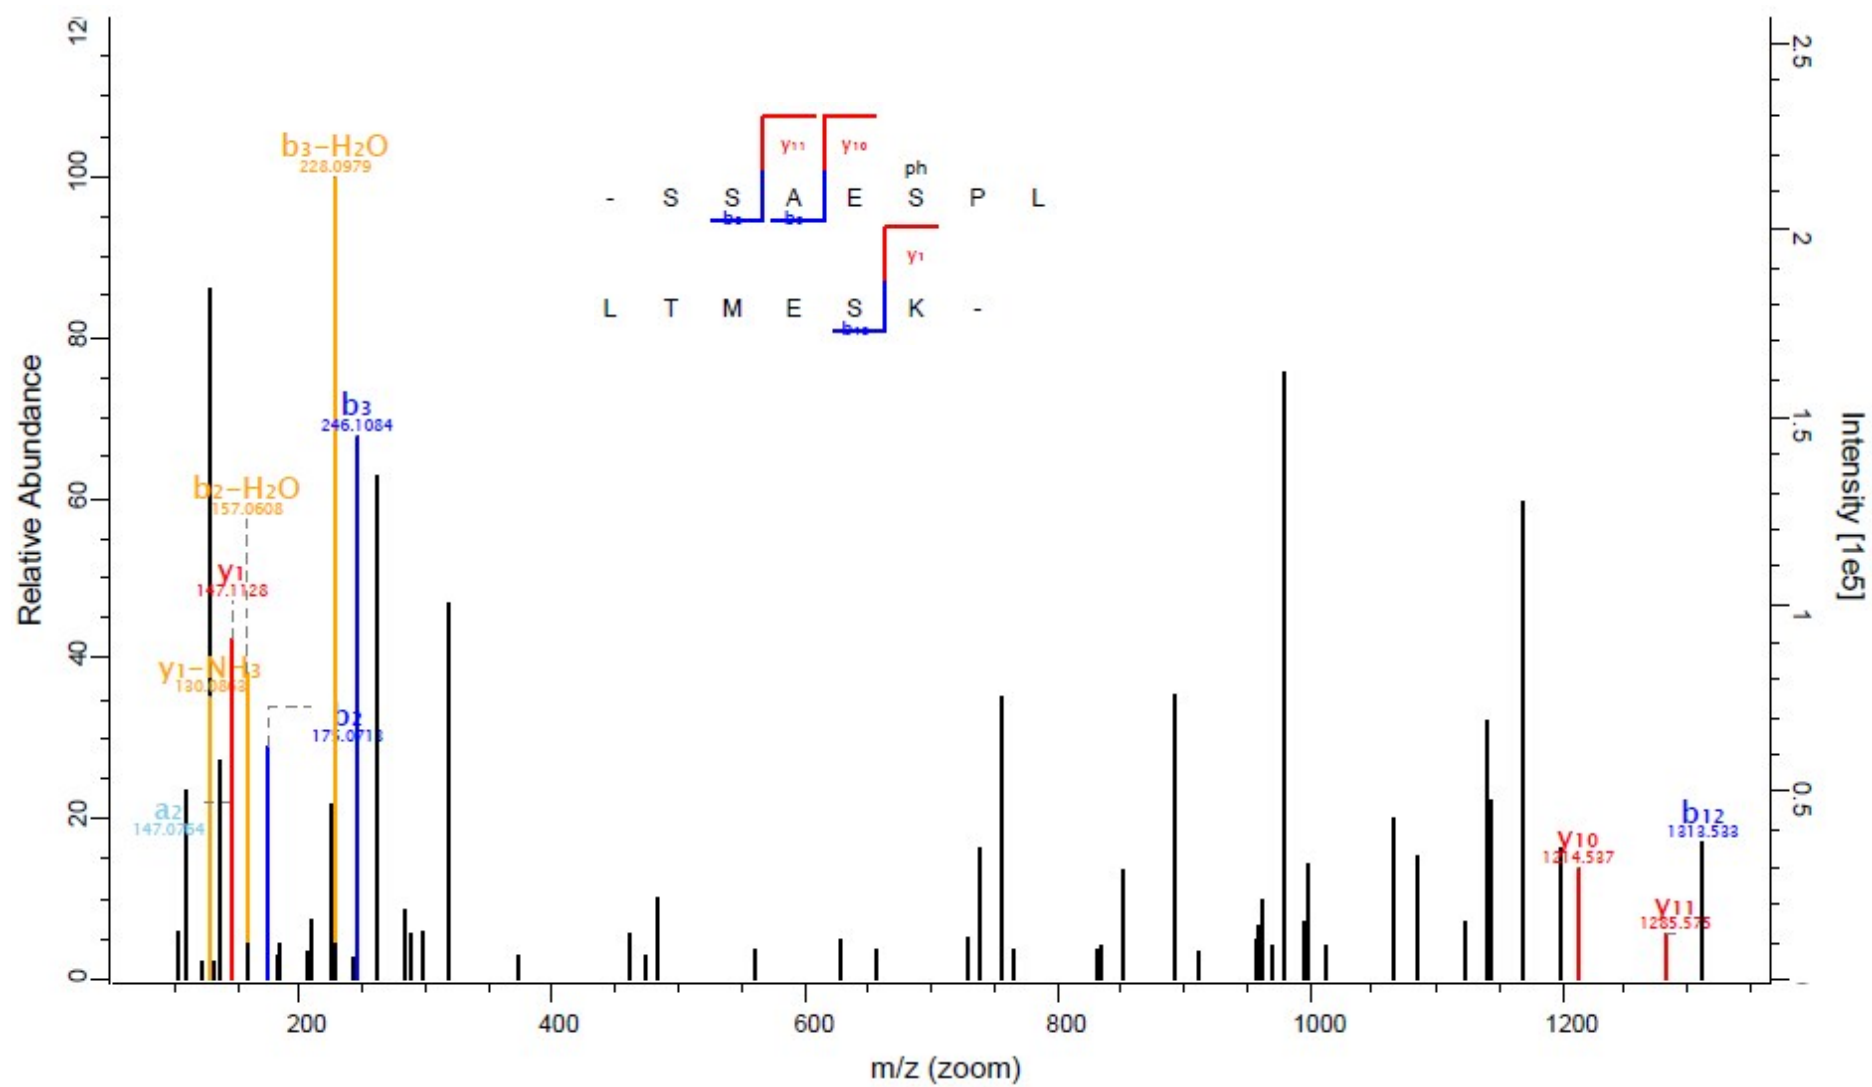

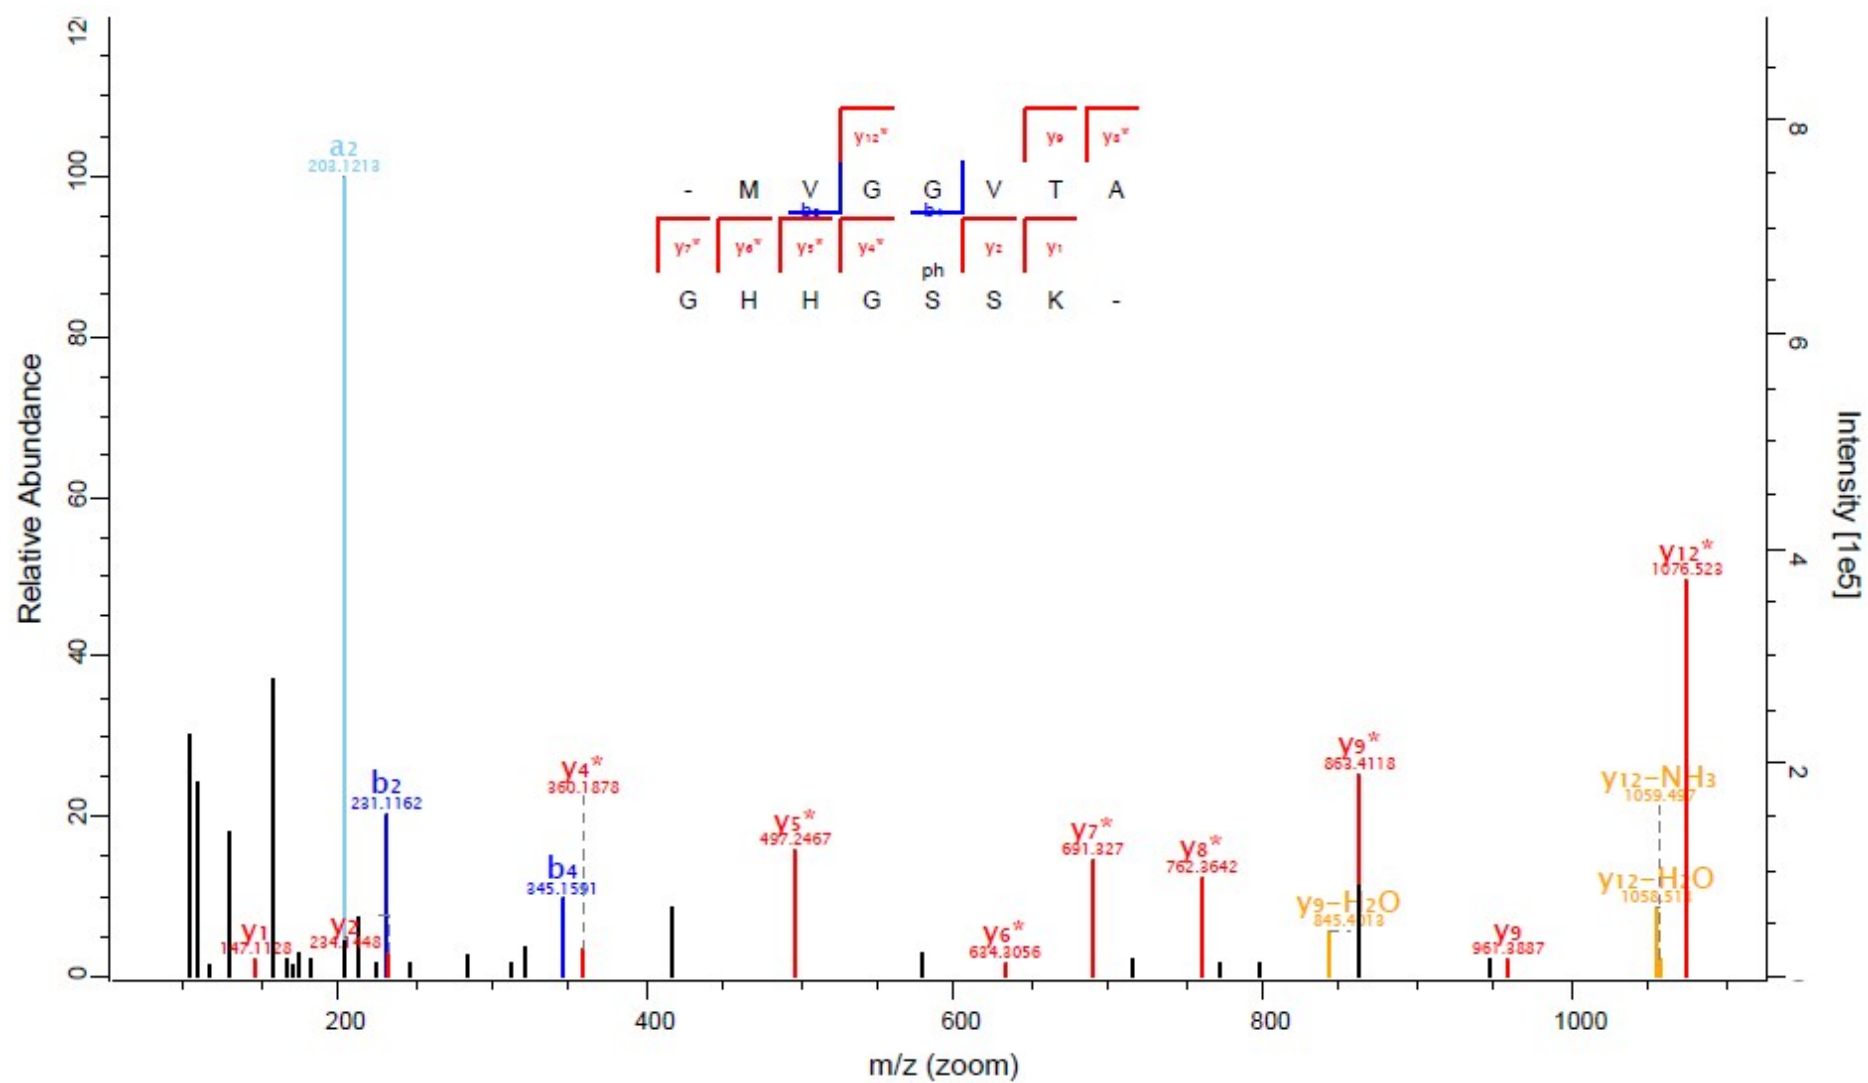

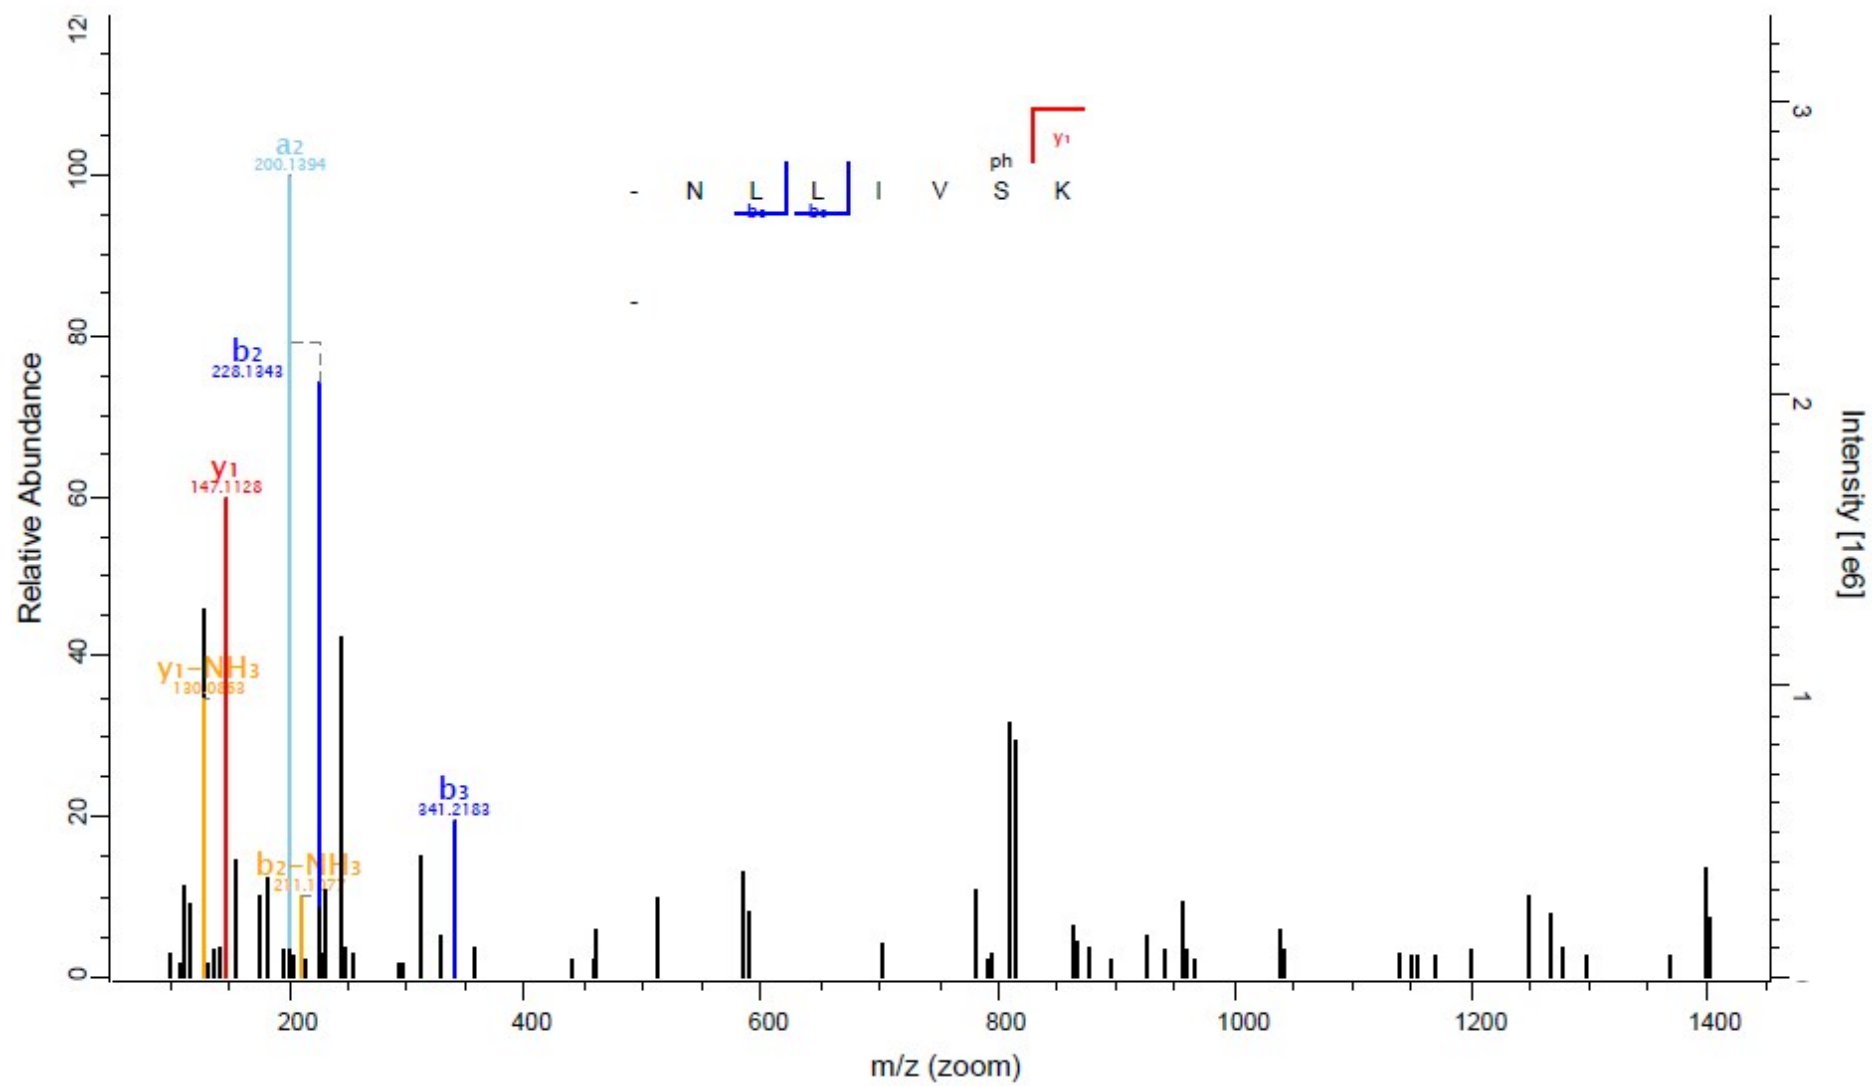

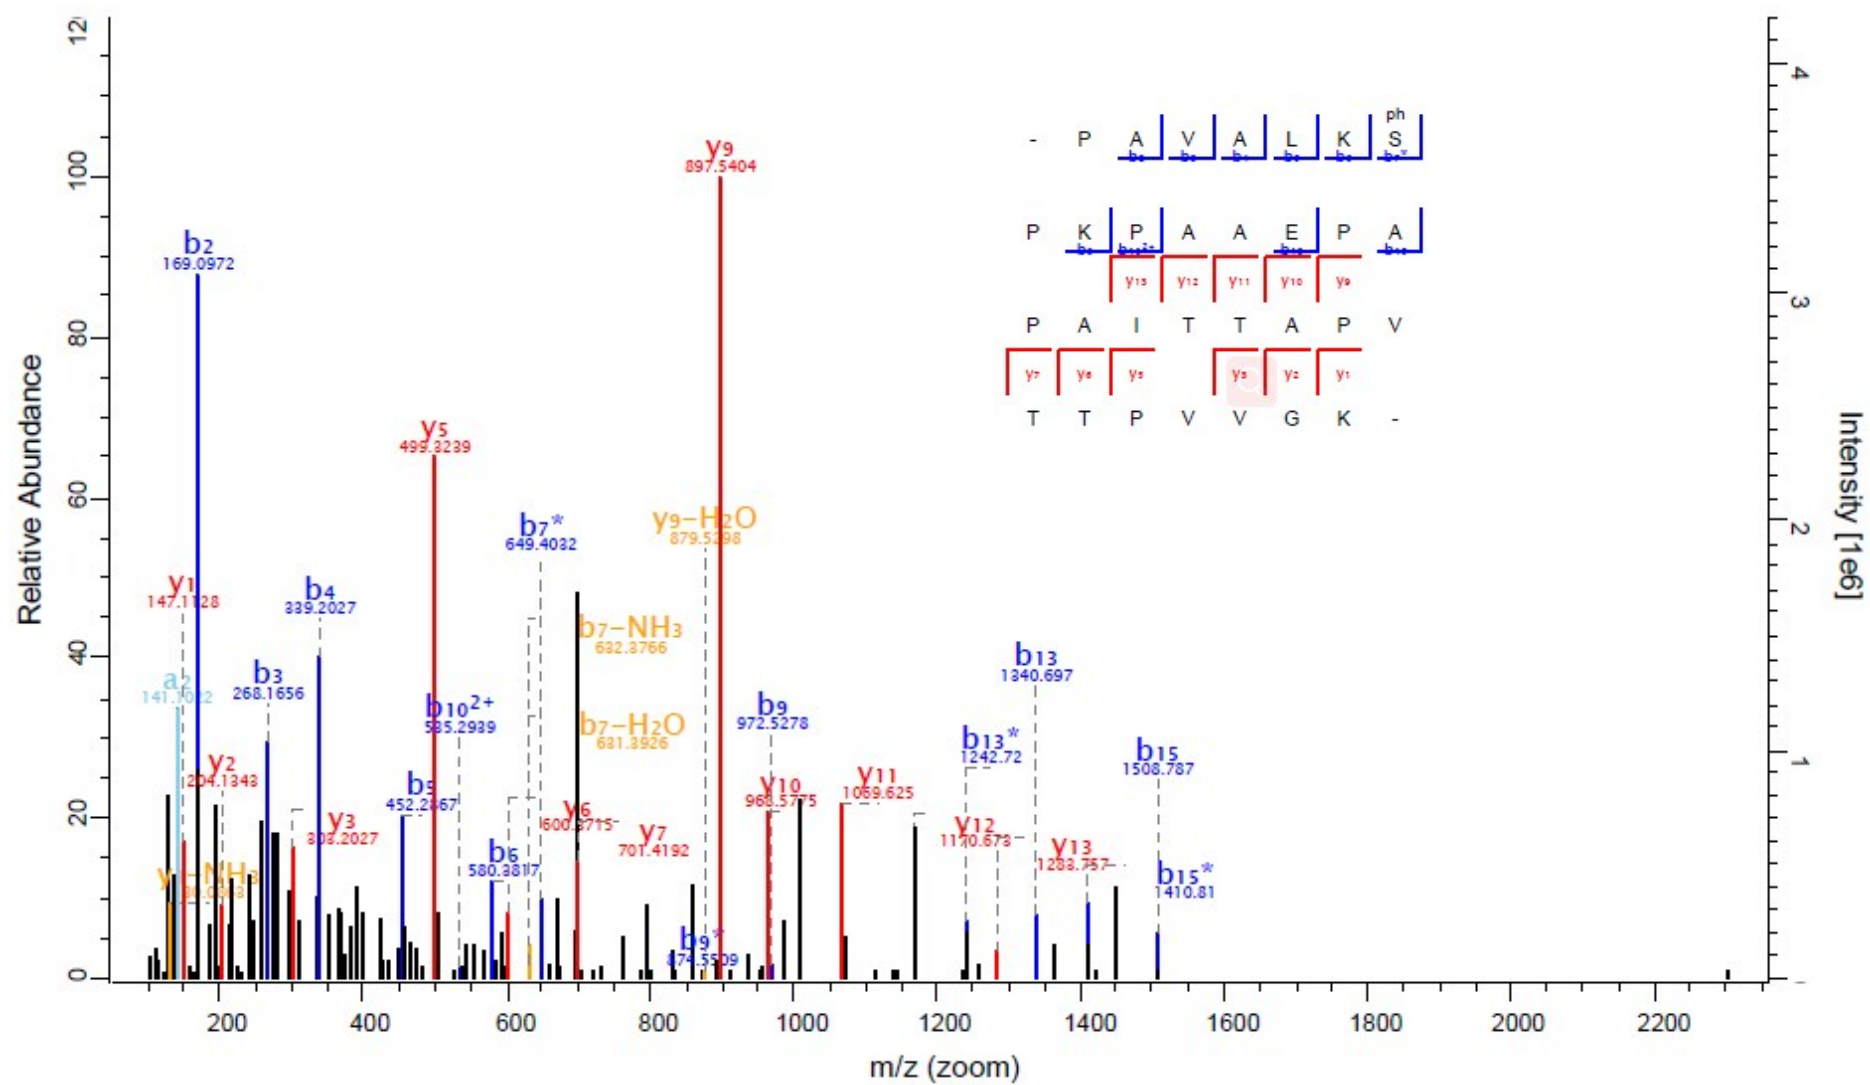

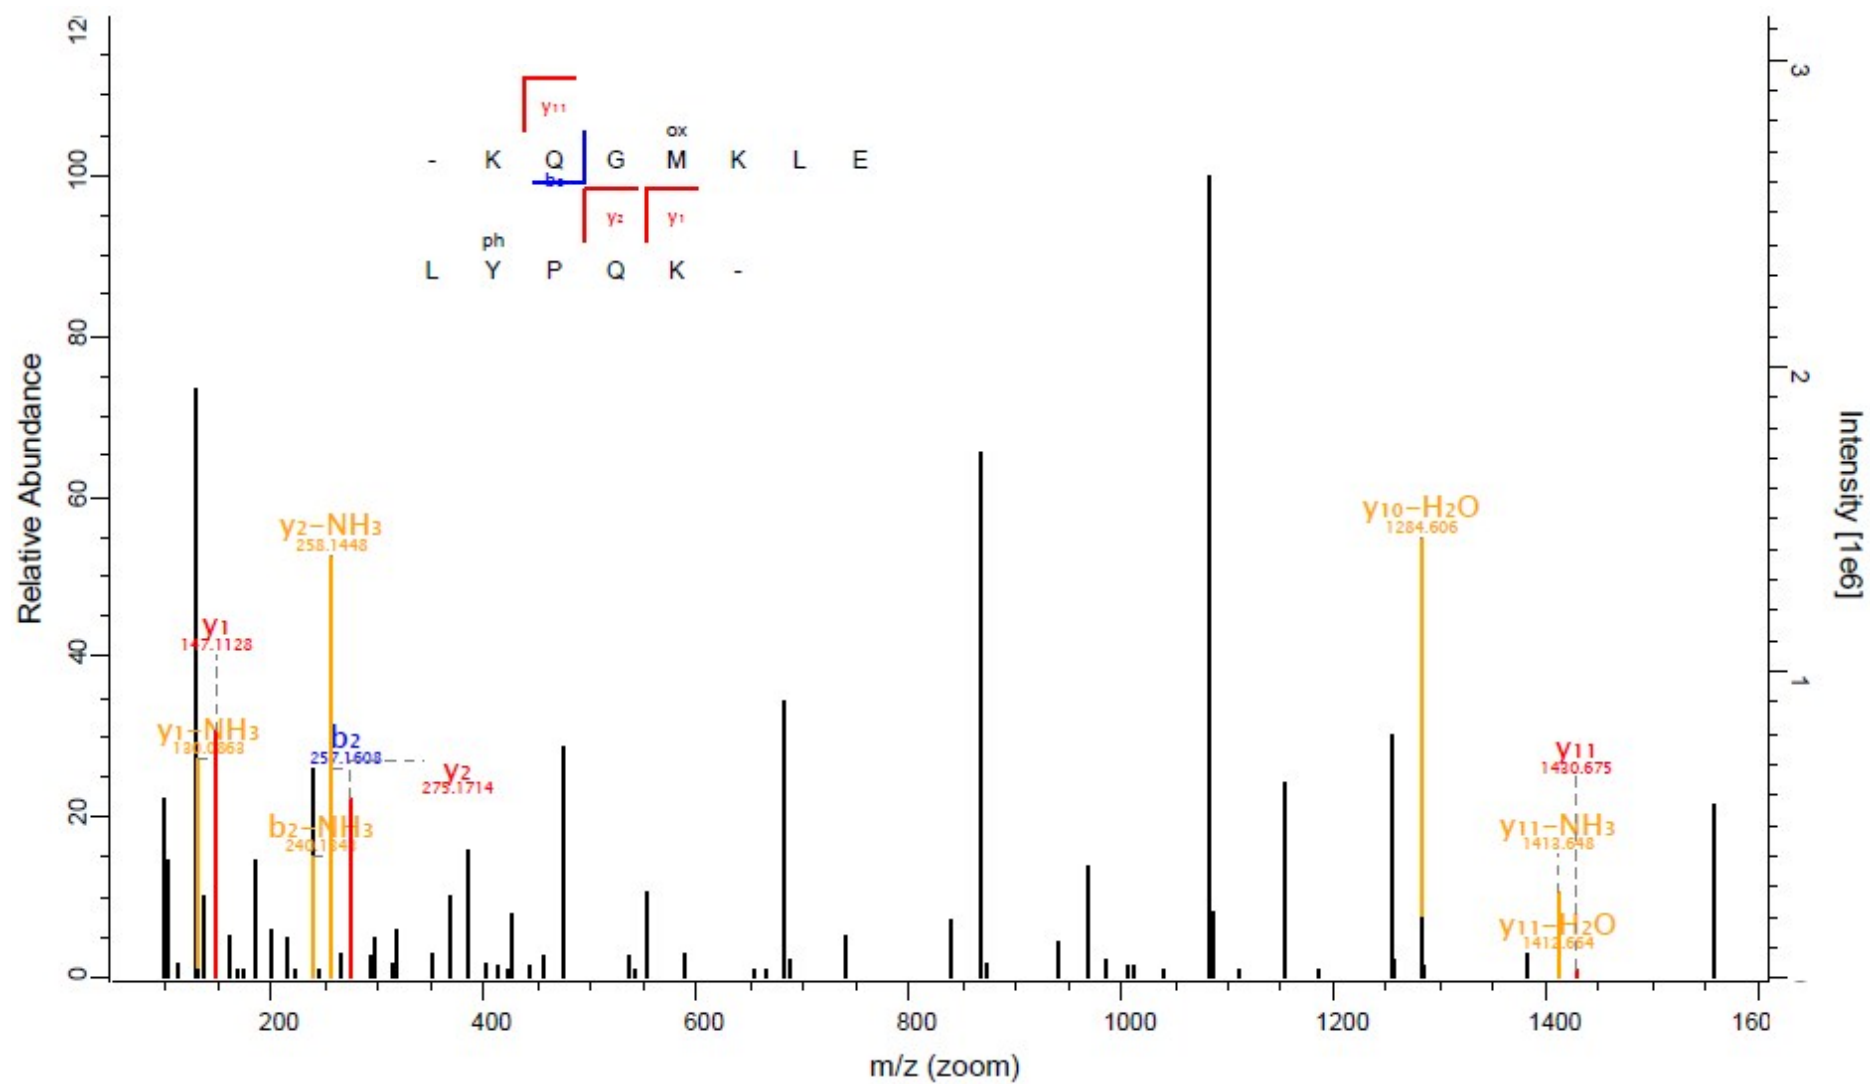

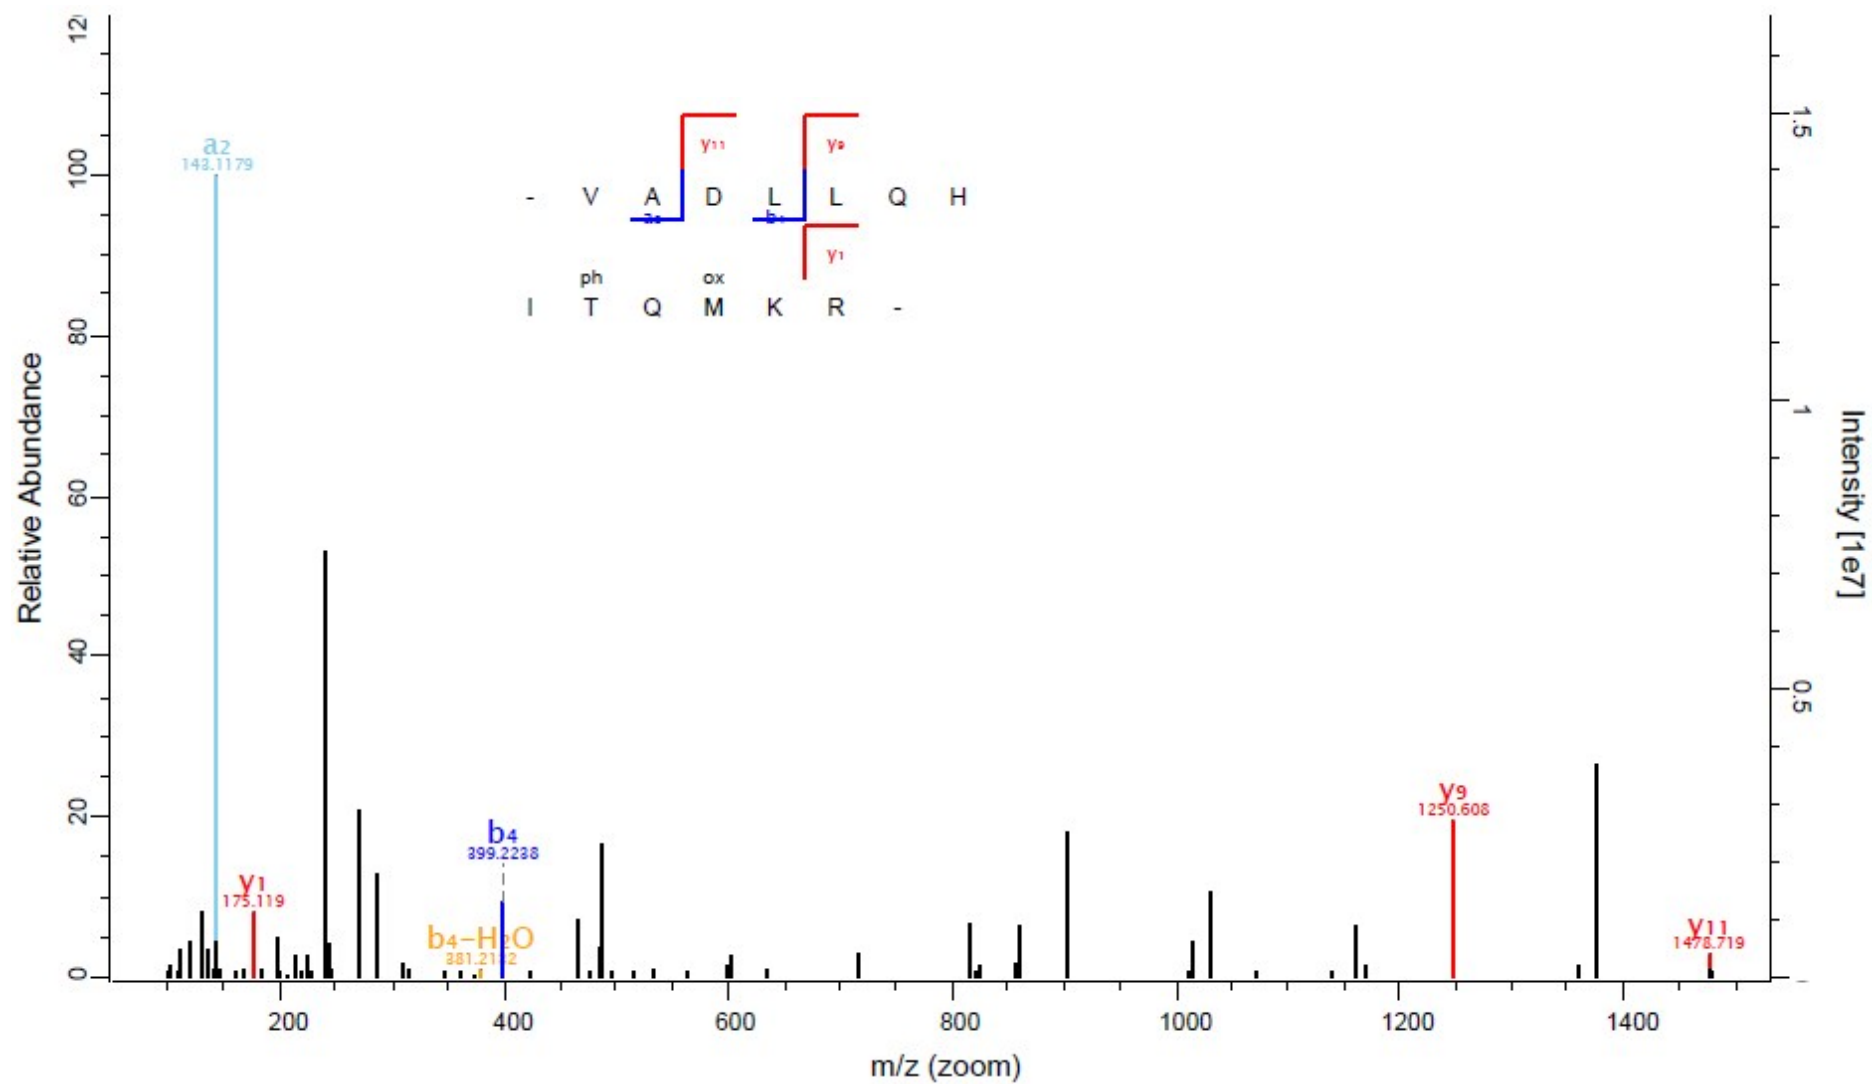

Supplement: c9fo01397k1.pdf [file c9fo01397k1.pdf]
